# Supplementary material for: Zm908p11, encoded by a short open reading frame (sORF) gene, functions in pollen tube growth as a profilin ligand in maize
Source: PubMed Central journal article supplement — J Exp Bot. 2013 May 15;64(8):2359–72. doi: 10.1093/jxb/ert093 (PMC3654424; doi:10.1093/jxb/ert093), 2013-05-15
Supplement: supp_ert093_jexbot091181_file001.pdf [file supp_ert093_jexbot091181_file001.pdf]

**Supplementary data to:**

**Zm908p11, encoded by a short open reading frame (sORF)  
gene, functions in pollen tube growth as a profilin ligand in  
maize**

**Xue Dong, Dongxue Wang, Peng Liu, Chengxia Li, Qian Zhao, Dengyun Zhu, Jingjuan  
Yu\***

## Supplementary material and methods section

### *Constructs for tobacco transformation*

#### *35S-Zm908s and 35S-Zm908a*

The full length of *Zm908* cDNA was amplified from genomic clone *Zm908* with primer pair 9pf and 9pr (Table S1) on a S1000™ thermal cycler (Bio-Rad, USA). The PCR product, named *Zm908s*, was cloned into pMD18-T (TaKaRa, Japan) to produce pMD18-*Zm908s*. *Zm908s* was then excised with *SacI* and *XbaI* from pMD18-*Zm908s* and inserted into the same sites of pBI121 between the *CaMV35S* promoter, and the *Nos* terminator, replacing the *GUS* gene to generate the sense construct *35S-Zm908s* (Fig. S1A). *Zm908s* was first excised by *HindIII* from pMD18-*Zm908s*, end filled with dNTP using Klenow (TaKaRa, Japan), then excised by *SacI* and inserted into the *SacI* and *SmaI* sites of pBI121 between the *CaMV35S* promoter, and the *Nos* terminator, replacing the *GUS* gene to generate the antisense construct *35S-Zm908a* (Fig. S1B).

#### *35S-Zm908p11, 35S-Zm908p11ss and 35S-Zm908p11fs*

The longest ORF (+697 to +990) was amplified from pMD18-*Zm908s* with primer pair 9p11f and 9p11r (Table S1). The PCR product, called *Zm908p11*, was cloned into the *BamHI* and *SacI* sites of pBI121 to produce *35S-Zm908p11* (Fig. S1C). The primer pairs 9pf/9pr, 9p11ssf/9p11ssr and 9p11fsf/9p11fsr (Table S1) were used to generate a site-specific mutation (the ATG start codon was replaced by AAG), and a frame-shift mutation (the ATG start codon was replaced by ATGA) of *Zm908p11* from pMD18-*Zm908s* by overlapping PCR. After sequencing, the fragments *Zm908p11ss* and *Zm908p11fs* were excised using *BamHI* and *SacI*, and cloned into pBI121 between the *CaMV35S* promoter, and the *Nos* terminator, replacing the *GUS* gene to produce the constructs *35S-Zm908p11ss* (Fig. S1D); and *35S-Zm908p11fs* (Fig. S1E).

#### *Lat52-Zm908s and Lat52-Zm908p11*

The *Lat52* promoter was amplified from tobacco pollen cDNA with primer pair lat52f and lat52r (Table S1), and inserted into the *HindIII* and *BamHI* sites of *35S-Zm908s* and

*35S-Zm908p11*, replacing the *CaMV35S* promoter to produce *Lat52-Zm908s* (Fig. S1F); and *Lat52-Zm908p11* (Fig. S1G).

### ***Constructs for maize transformation***

A 282 bp promoter fragment of *Zm908* (*Zm908p*) was amplified from genome clone *Zm908* with primer pair 9prof and 9pror (Table S1), and then cloned into the *HindIII* and *BamHI* sites of pMD18-T to produce pMD18-*Zm908p*. The *Zm908p* fragment was excised with *HindIII* and *BamHI* from pMD18-*Zm908p*, and inserted into the same sites of pROK219 to generate pROK219-*Zm908p*. The *Zm908p11* fragment was excised from *35S-Zm908p11* with *BamHI* and *SacI* and inserted into the corresponding sites of pROK219-*Zm908p*, and then fused with an *hpt* gene (hygromycin B phosphotransferase) controlled by the *CaMV35S* promoter at *HindIII* site to produce the overexpression construct *Zm908p-Zm908p11OE* (Fig. S1H). To generate the RNAi construct, the 3'-UTR of *Zm908* was amplified from pMD18-*Zm908s* with primer pairs 9-3af/9-3ar and 9-3sf/9-3sr (Table S1), and cloned into the *BamHI/XbaI* and *NcoI/SacI* sites of pGEX-KG respectively, to generate pGEX-KG-stem. The loop fragment was amplified from the *GUS* gene of pBI121 with primer pair *gusf* and *gusr* (Table S1), and inserted into the *XbaI* and *NcoI* sites of pGEX-KG-stem. The stem-loop fragment was excised using *BamHI* and *SacI*, and cloned into the same sites of pROK219-*Zm908p*. Finally, an *hpt* gene controlled by the *CaMV35S* promoter was fused with pROK219-*Zm908p*-stemloop at *HindIII* site to produce *Zm908p-Zm908p11Ri* (Fig. S1I).

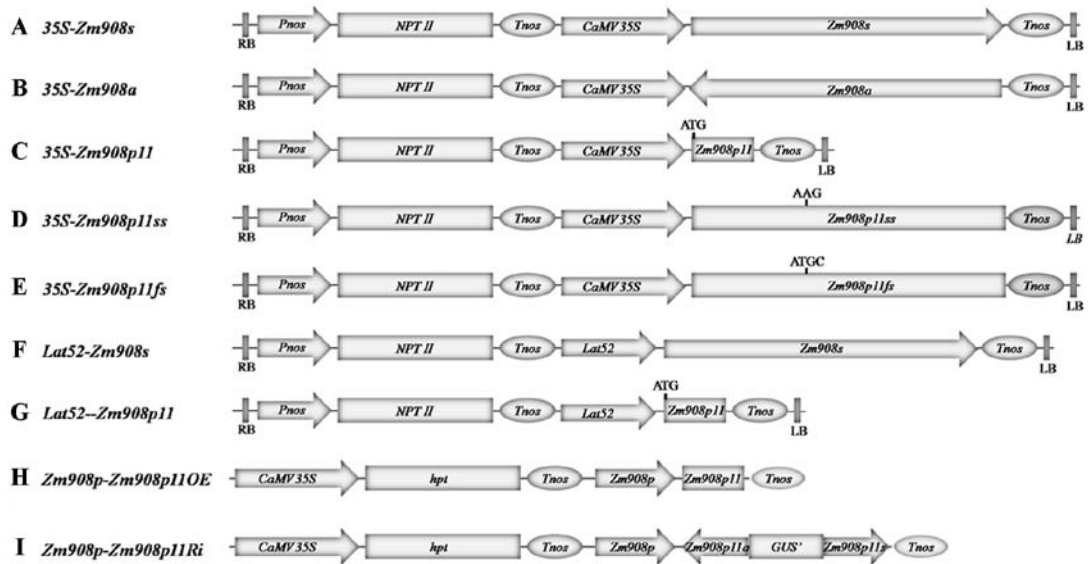

**Supplemental Fig. S1:** Diagram of the constructs used in the present study. RB, right border; LB, left border; *Pnos*: nopaline synthase gene promoter; *NPTII*, gene encoding neomycin phosphotransferase II; *Tnos*: nopaline synthase gene terminator; *CaMV 35S*, *cauliflower mosaic virus 35S* promoter; *Zm908p11*, the longest ORF of *Zm908* cDNA; *Zm908p11ss*, *Zm908* cDNA with a site-specific mutation in the ATG start codon of *Zm908p11*; *Zm908p11fs*, *Zm908* cDNA with a frame-shift mutant of *Zm908p11*; *hpt*, hygromycin B phosphotransferase gene; *Zm908p11a*, antisense of 3'-UTR of *Zm908*; *GUS'*, a part of *GUS* gene; *Zm908p11s*, sense of 3'-UTR of *Zm908*.

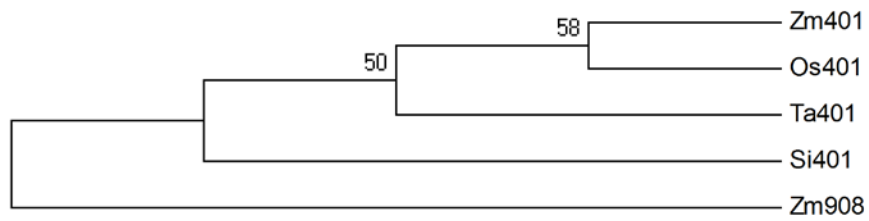

**Supplemental Fig. S2:** Phylogenetic analysis of *Zm908*.

*Zm401*, *Zea mays* AY911609; *Os401*, *Oryza sativa* EU426833; *Ta401*, *Triticum aestivum* EU426832; *Si401*, *Setaria italica* DQ981487.

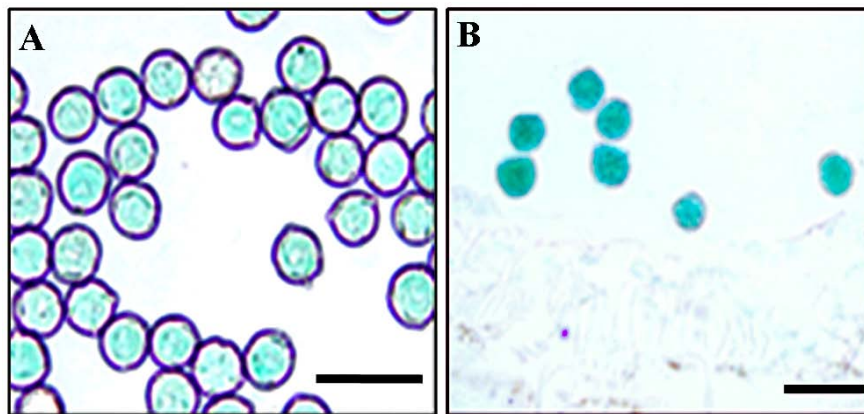

**Supplemental Fig. S3:** GUS staining of pollen grains and anther from *Zm908p-GUS* transgenic tobacco. (A) GUS staining of pollen grains from *Zm908p-GUS* transgenic anther. (B) Cross sections of the anther of *Zm908p-GUS* transgenic tobacco. Bars = 100  $\mu$ m.

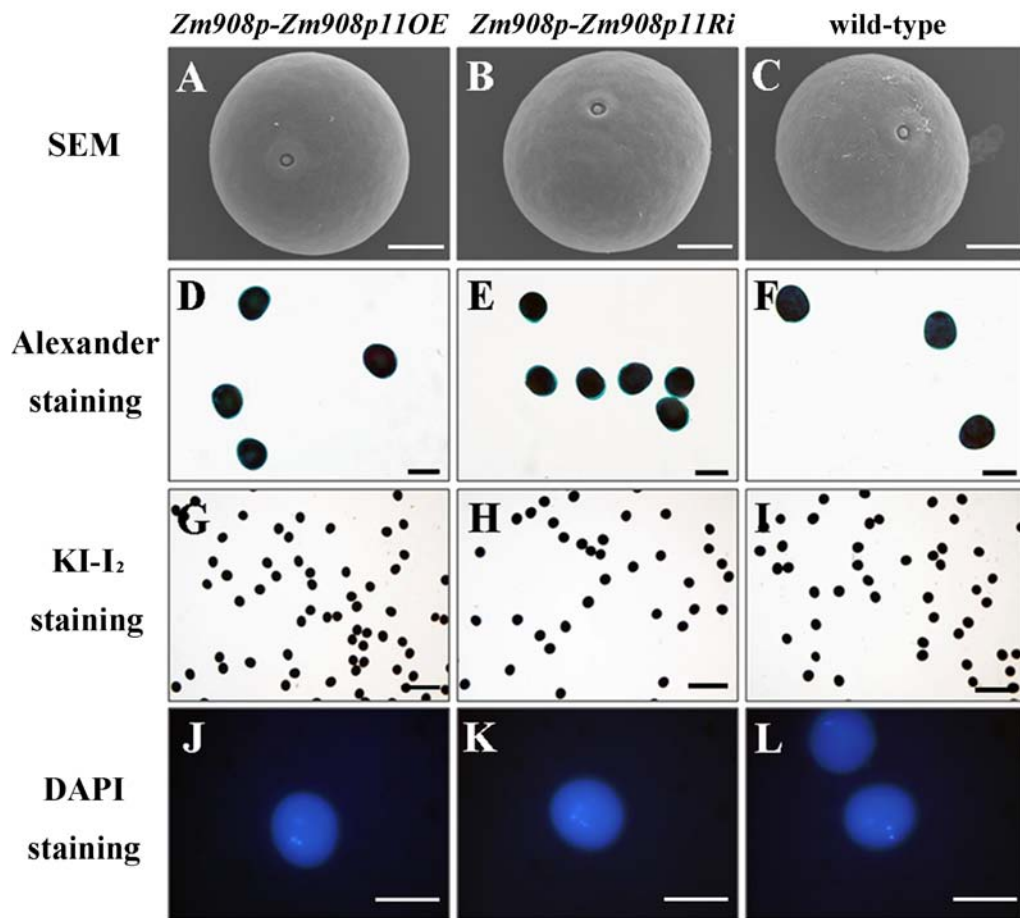

**Supplemental Fig. S4** Phenotypic analysis of pollen from *Zm908p-Zm908p11OE*, *Zm908p-Zm908p11Ri* and wild-type maize plants.

(A), (D), (G) and (J) Pollen grains from *Zm908p-Zm908p11OE* plants. (B), (E), (H) and (K) Pollen grains from *Zm908p-Zm908p11Ri* plants. (C), (F), (I) and (L) Pollen grains from wild-type plants. (A) to (C) Scanning electron microscopy (SEM). Bars = 20  $\mu$ m. (D) to (F) Alexander staining. Bars = 50  $\mu$ m. (G) to (I) KI-I<sub>2</sub> staining. Bars = 200  $\mu$ m. (J) to (L) DAPI staining. Bars = 50  $\mu$ m.

**Supplemental Table S1:** List of primers used for gene cloning and qRT-PCR assays

| Primer name | Primer sequence                             |
|-------------|---------------------------------------------|
| 9pf         | 5'-CGCTCGCACTAGAGAACTTG-3'                  |
| 9pr         | 5'-CAAGAGATATTCGGGCATAA-3'                  |
| 9p11f       | 5'-CGGGATCCTCACATGACCTACAATGAGG-3'          |
| 9p11r       | 5'-CGGAGCTCCGAAGCTCTTCAAATCGCT-3'           |
| 9p11ssf     | 5'-TGACCTACAAAGAGGTGGTAC-3'                 |
| 9p11ssr     | 5'-ATGTACCACCTCTTTGTAGGT-3'                 |
| 9p11fsf     | 5'-TGACTTACAATGAAGGTGGTAC-3'                |
| 9p11fsr     | 5'-ATGTACCACCTTCATTGTAGGT-3'                |
| 9prof       | 5'-TCAAGCTTGTATTTAATAAAAATAGTTCCAAGATTTT-3' |
| 9pror       | 5'-GGGGATCCAATGGTCAGAGAAACATATGAATAG-3'     |
| 9-3af       | 5'-GCTCTAGAGCCCCCTCTATTTCTGTTTCTTC-3'       |
| 9-3ar       | 5'-CGCGGATCCGCGTACTTCTCTGGTTTGTGTTCTA-3'    |
| 9-3sf       | 5'-CATGCCATGGCATGCCCTCTATTTCTGTTTCTTC-3'    |
| 9-3sr       | 5'-CGAGCTCGTACTTCTCTGGTTTGTGTTCTA-3'        |
| gusf        | 5'-GCTCTAGAGCTTACGGCAAAGTGTGGGTC-3'         |
| gusr        | 5'-CATGCCATGGCATGTTGCCAGAGGTGCGGATT-3'      |
| prtf        | 5'-TACAATGAGGTGGTACATGGCT-3'                |
| ptrr        | 5'-TCAAATCGCTCTATCAGATGGAC-3'               |
| trtf        | 5'-GAGCATGGCATTACAGGCTCACG-3'               |
| trtr        | 5'-TCAACAAAAACAGCACGGGGCA-3'                |
| 9Gf         | 5'-GATATCATGAGGTGGTACATGGCT-3'              |
| 9Gr         | 5'-GGTACCAATCGCTCTATCAGATGGACT-3'           |
| y2h9Nf      | 5'-CGGGATCCCGATGAGGTGGTACATGGC-3'           |
| y2h9Nr      | 5'-GTCGACGAATCGCTCTATCAGATGGACT-3'          |
| y2hPf       | 5'-CCGGAATTCATGTCGTGGCAGACGT-3'             |
| y2hPr       | 5'-CTCGAGCTTACATCCCCTG-3'                   |
| L9f         | 5'-GGGGTACCATGAGGTGGTACATGG-3'              |
| NL9r        | 5'-ACGCGTCGACAATCGCTCTATC-3'                |
| CL9r        | 5'-ACGCGTCGACTCAAATCGCTCTATC-3'             |
| LPf         | 5'-GGGGTACCATGTCGTGGCAGACGT-3'              |
| NLPr        | 5'-ACGCGTCGACTTACATCCCCTG-3'                |
| CLPr        | 5'-ACGCGTCGACTCATTACATCCCCTG-3'             |



**Supplemental Table S2:** List of genes upregulated and downregulated which were changed more than 2-fold in the microarray analysis

| Affymetrix number  | Fold change<br>(OE/WT) | GenBank ID | Putative function                                  |
|--------------------|------------------------|------------|----------------------------------------------------|
| Zm.12272.1.A1_at   | 153.77                 | BM351641   | ---                                                |
| Zm.3837.1.S1_at    | 144.27                 | AI978033   | epoxide hydrolase 2                                |
| Zm.10168.1.A1_at   | 123.05                 | CA404699   | ---                                                |
| Zm.18100.4.A1_at   | 101.62                 | CD999582   | ACT domain containing protein                      |
| Zm.934.1.S1_at     | 51.484                 | BF729446   | ---                                                |
| Zm.9879.1.A1_at    | 33.563                 | BM339505   | hypothetical protein LOC100217169                  |
| Zm.3561.1.A1_at    | 31.929                 | CK826673   | hypothetical protein LOC100275649                  |
| Zm.8749.1.A1_at    | 27.078                 | BM335905   | ---                                                |
| Zm.18100.1.S1_a_at | 17.995                 | AI967288   | ---                                                |
| Zm.2571.1.A1_at    | 14.344                 | AY106387.1 | ---                                                |
| Zm.12367.1.S1_at   | 12.932                 | BQ577550   | ---                                                |
| Zm.241.1.S1_at     | 12.859                 | CK786973   | Superoxide dismutase4                              |
| Zm.2787.1.A1_at    | 9.593                  | AY105546.1 | hypothetical protein LOC100191148                  |
| Zm.6364.1.A1_at    | 9.354                  | AI691566   | hypothetical protein LOC100277739                  |
| Zm.1798.1.A1_a_at  | 8.716                  | BE519060   | ---                                                |
| ZmAfx.447.1.A1_at  | 8.195                  | AI677073   | hypothetical protein LOC100193673                  |
| Zm.13280.1.S1_at   | 8.106                  | CA826511   | ---                                                |
| Zm.12666.1.S1_a_at | 7.411                  | AY536122.1 | meg2 protein/meg4 protein/meg6 protein             |
| Zm.2077.1.A1_at    | 7.202                  | CA401374   | ---                                                |
| Zm.18006.1.A1_at   | 7.076                  | AW400144   | hypothetical protein LOC100273180                  |
| Zm.10809.1.A1_a_at | 6.863                  | AY104721.1 | mitochondrial inner membrane<br>protease subunit 1 |
| Zm.16504.1.A1_at   | 6.483                  | X54076.1   | heat shock protein18f                              |
| Zm.13137.2.S1_a_at | 6.235                  | CO518420   | ---                                                |
| Zm.12259.1.S1_at   | 5.633                  | BQ578011   | ---                                                |
| Zm.12557.1.A1_at   | 5.592                  | AI691470   | ---                                                |
| Zm.11746.1.A1_at   | 5.533                  | BM380405   | ---                                                |

|                     |       |             |                                        |
|---------------------|-------|-------------|----------------------------------------|
| Zm.7156.3.S1_a_at   | 5.373 | CF017430    | hypothetical protein LOC100193362      |
| Zm.6431.1.A1_at     | 5.223 | CO525297    | hypothetical protein LOC100193964      |
| Zm.6448.1.A1_at     | 5.054 | BG842262    | antigenic determinant of rec-A protein |
| Zm.18319.1.A1_at    | 5.024 | CO531171    | hypothetical protein LOC100216754      |
| Zm.10461.1.S1_at    | 4.991 | CA826724    | ---                                    |
| Zm.10498.1.S1_at    | 4.979 | BQ528852    | ---                                    |
| Zm.16813.1.S1_at    | 4.564 | AI649555    | ---                                    |
| Zm.15840.1.A1_at    | 4.502 | CK827017    | receptor kinase 1                      |
| Zm.15965.1.A1_at    | 4.441 | AI677363    | signal peptidase complex subunit 1     |
| Zm.13302.1.S1_at    | 4.435 | CA827293    | ---                                    |
| Zm.12666.1.S1_x_at  | 4.424 | AY536122.1  | meg2 protein                           |
| Zm.6315.1.A1_at     | 4.309 | AI691364    | ---                                    |
| Zm.4049.1.A1_at     | 4.214 | AI834098    | hypothetical protein LOC100279705      |
| Zm.3782.1.S1_at     | 4.204 | AW066955    | vacuolar protein sorting 26            |
| ZmAffx.1425.1.S1_at | 4.127 | 11990232-10 | ---                                    |
| Zm.12666.4.S1_x_at  | 4.109 | AY536123.1  | meg2 protein/meg6 protein              |
| Zm.2922.1.A1_at     | 4.031 | CO532813    | ---                                    |
| Zm.15937.1.A1_at    | 4     | CO520791    | ---                                    |
| Zm.4256.1.S1_at     | 3.954 | CA403577    | ---                                    |
| Zm.16468.1.S1_at    | 3.904 | CD999619    | hypothetical protein LOC100277908      |
| Zm.17.1.A1_at       | 3.876 | M76684.1    | orange pericarp1                       |
| Zm.17300.1.A1_a_at  | 3.869 | CK371224    | hypothetical protein LOC100275883      |
| Zm.17428.1.A1_at    | 3.851 | CK145261    | pyridoxin biosynthesis protein ER1     |
| Zm.1581.1.S1_at     | 3.816 | AW566202    | ---                                    |
| Zm.5653.1.A1_at     | 3.642 | BM074926    | ---                                    |
| ZmAffx.1509.1.S1_at | 3.637 | 11990232-51 | ---                                    |
| ZmAffx.1468.1.S1_at | 3.632 | 11990232-35 | ---                                    |
| Zm.8651.1.A1_at     | 3.551 | BM075068    | hypothetical protein LOC100275908      |
| Zm.17694.1.S1_at    | 3.534 | CK370322    | ---                                    |

|                       |       |             |                                                   |
|-----------------------|-------|-------------|---------------------------------------------------|
| Zm.10069.1.A1_at      | 3.519 | AY108373.1  | ---                                               |
| Zm.1974.1.A1_at       | 3.301 | CF920129    | ---                                               |
| Zm.6485.1.A1_at       | 3.292 | CB617134    | growth-regulating factor 2-like                   |
| Zm.4040.1.A1_at       | 3.282 | AI834032    | ---                                               |
| Zm.6961.1.A1_at       | 3.281 | AY104000.1  | hypothetical protein LOC100191822                 |
| Zm.13394.1.A1_at      | 3.275 | AW066700    | ---                                               |
| Zm.9311.2.A1_x_at     | 3.259 | CB350735    | hypothetical protein LOC100274965                 |
| ZmAffx.1438.1.S1_at   | 3.259 | 11990232-4  | ---                                               |
| Zm.3740.1.A1_at       | 3.238 | BG840857    | 22.0 kDa class IV heat shock protein              |
| Zm.2966.1.S1_at       | 3.216 | AI001347    | hypothetical protein LOC100273775                 |
| Zm.3309.1.S1_at       | 3.215 | AW120013    | ---                                               |
| Zm.369.1.A1_at        | 3.177 | AF035460.1  | low molecular weight heat shock protein precursor |
| Zm.16472.1.A1_at      | 3.159 | AW330974    | hypothetical protein LOC100273196                 |
| Zm.6380.1.A1_at       | 3.158 | BG266095    | ---                                               |
| Zm.6763.4.S1_at       | 3.156 | BG841872    | hypothetical protein LOC100279574                 |
| Zm.9568.1.A1_a_at     | 3.156 | CD435747    | hypothetical protein LOC100191846                 |
| ZmAffx.1306.1.S1_s_at | 3.151 | 11990232-74 | 30S ribosomal protein S7                          |
| Zm.16281.1.S1_at      | 3.143 | BM378604    | ---                                               |
| Zm.12398.1.S1_at      | 3.139 | BE510957    | hypothetical protein LOC100275003                 |
| Zm.14419.1.A1_s_at    | 3.124 | U76259.1    | elongation factor 1-alpha                         |
| Zm.17266.1.A1_at      | 3.052 | CF245152    | ---                                               |
| Zm.10697.1.A1_at      | 3.018 | AY105794.1  | hypothetical protein LOC100273137                 |
| Zm.841.1.A1_at        | 2.977 | AY110353.1  | placental protein 11                              |
| Zm.18214.1.S1_at      | 2.963 | CN845337    | ---                                               |
| Zm.16963.1.S1_at      | 2.913 | CF635658    | voltage-gated potassium channel beta subunit      |
| Zm.5048.6.A1_at       | 2.896 | BM380925    | endoplasmic                                       |
| Zm.9140.2.A1_a_at     | 2.877 | CF634748    | ---                                               |
| Zm.612.1.A1_at        | 2.856 | AF326500.1  | tonoplast membrane integral protein               |

## ZmTIP1-2

|                           |       |             |                                   |
|---------------------------|-------|-------------|-----------------------------------|
| Zm.6721.5.A1_at           | 2.848 | CF634010    | Histone H4                        |
| Zm.17198.1.A1_at          | 2.828 | AY108769.1  | BSD domain containing protein     |
| Zm.6748.1.A1_at           | 2.819 | BM351187    | Ribosomal protein L26             |
| Zm.6553.1.A1_at           | 2.811 | BG265813    | ---                               |
| Zm.4318.1.A1_at           | 2.798 | CA403945    | hypothetical protein LOC100193401 |
| Zm.2005.1.A1_at           | 2.785 | BM379246    | elicitor-responsive protein 1     |
| Zm.12727.1.S1_at          | 2.76  | CD997307    | ---                               |
| Zm.9249.1.A1_at           | 2.741 | AW438186    | ---                               |
| Zm.2242.1.A1_at           | 2.724 | AW330660    | ---                               |
| ZmAffx.949.1.A1_at        | 2.718 | AI833412    | ---                               |
| Zm.11475.1.A1_a_at        | 2.696 | BQ539206    | hypothetical protein LOC100273223 |
| Zm.10120.1.A1_at          | 2.695 | BM380514    | DNA binding like                  |
| Zm.1128.1.S1_at           | 2.693 | BM736430    | ---                               |
| Zm.4868.1.S1_at           | 2.675 | AY105012.1  | SWIb domain-containing protein    |
| ZmAffx.1333.1.S1_s<br>_at | 2.674 | 11990232-81 | ---                               |
| Zm.5050.1.S1_at           | 2.662 | AF016305.1  | ATP sulfurylase                   |
| Zm.311.1.A1_at            | 2.658 | BM268583    | 18 kda heat shock protein18a      |
| Zm.4345.1.A1_at           | 2.653 | AW091099    | hypothetical protein LOC100272516 |
| Zm.4321.1.S1_at           | 2.65  | AI855098    | hypothetical protein LOC100191344 |
| Zm.5322.2.A1_a_at         | 2.641 | CF632817    | hypothetical protein LOC100273032 |
| Zm.1482.5.A1_a_at         | 2.632 | AI714961    | hypothetical protein LOC100274856 |
| Zm.3095.1.S1_at           | 2.625 | CO524214    | hypothetical protein LOC100192080 |
| Zm.10216.1.A1_at          | 2.618 | CD440291    | hypothetical protein LOC100276703 |
| Zm.9547.1.A1_at           | 2.607 | CK827410    | hypothetical protein LOC100193504 |
| Zm.12152.1.S1_at          | 2.604 | CK394699    | hypothetical protein LOC100274505 |
| Zm.1482.1.A1_a_at         | 2.597 | BG837937    | hypothetical protein LOC100274856 |
| Zm.12735.1.A1_at          | 2.588 | AI491263    | hypothetical protein LOC100274318 |
| Zm.15527.1.A1_at          | 2.588 | CK145031    | hypothetical protein LOC100274385 |

|                     |       |             |                                                |
|---------------------|-------|-------------|------------------------------------------------|
| Zm.2802.1.S1_at     | 2.568 | CK368569    | deoxyribonuclease tatD                         |
| Zm.3873.1.S1_at     | 2.564 | AW061742    | GMN10                                          |
| Zm.2128.1.S1_at     | 2.563 | AY105930.1  | hypothetical protein LOC100216750              |
| Zm.4351.1.A1_at     | 2.556 | AI861482    | hypothetical protein LOC100191604              |
| Zm.16741.1.S1_at    | 2.552 | AY108913.1  | ---                                            |
| Zm.2047.1.S1_at     | 2.552 | AJ006541    | ---                                            |
| Zm.10423.1.S1_at    | 2.545 | CN844467    | fatty acid desaturase8                         |
| Zm.2827.1.A1_at     | 2.543 | AY108627.1  | ---                                            |
| Zm.490.1.S1_a_at    | 2.542 | AF216853.1  | coatomer protein2                              |
| Zm.9568.1.A1_x_at   | 2.512 | CD435747    | hypothetical protein LOC100191846              |
| Zm.818.2.S1_at      | 2.509 | CO531833    | hypothetical protein LOC100216560              |
| Zm.16281.1.S1_x_at  | 2.497 | BM378604    | ---                                            |
| Zm.14407.2.S1_at    | 2.483 | AW424519    | hypothetical protein LOC100272648              |
| ZmAffx.1457.1.S1_at | 2.482 | 11990232-24 | ---                                            |
| Zm.13802.1.A1_at    | 2.481 | AY104843.1  | Zn-finger, RanBP-type,<br>containing protein   |
| Zm.365.1.A1_at      | 2.475 | AB062095.1  | response regulator 9                           |
| Zm.18357.1.S1_at    | 2.469 | CF626613    | hypothetical protein LOC100191155              |
| Zm.2276.1.S1_at     | 2.459 | CO531514    | thiol protease SEN102                          |
| ZmAffx.1428.1.S1_at | 2.459 | 11990232-13 | ---                                            |
| Zm.19030.1.A1_at    | 2.457 | AW179359    | hypothetical protein LOC100279586              |
| Zm.758.1.S1_at      | 2.457 | CK827705    | dehydrogenase/reductase SDR<br>family member 2 |
| Zm.2157.6.S1_s_at   | 2.455 | CD439607    | glycine-rich RNA-binding protein 2             |
| Zm.13440.1.S1_at    | 2.454 | BM379142    | ---                                            |
| Zm.9568.1.A1_at     | 2.444 | CD435747    | hypothetical protein LOC100191846              |
| Zm.6166.2.A1_at     | 2.443 | CO529261    | hypothetical protein LOC100278925              |
| Zm.3507.1.A1_at     | 2.429 | CK347589    | ---                                            |
| Zm.6795.1.S1_at     | 2.411 | CF632685    | acid phosphatase                               |
| Zm.13424.1.A1_at    | 2.397 | AF297044.1  | homocysteine S-methyltransferase-1             |
| Zm.4376.1.A1_at     | 2.394 | AI712238    | hypothetical protein LOC100275363              |

|                     |       |             |                                                                  |
|---------------------|-------|-------------|------------------------------------------------------------------|
| Zm.438.1.S1_at      | 2.394 | AF133840.1  | heat-shock protein 101                                           |
| Zm.13595.1.A1_at    | 2.393 | AY107750.1  | phosphatase phospho1                                             |
| ZmAffx.1463.1.S1_at | 2.392 | 11990232-30 | ---                                                              |
| Zm.13316.1.S1_at    | 2.381 | CA827638    | hypothetical protein LOC100277642                                |
| Zm.1979.1.S1_at     | 2.38  | AI948181    | DNA repair protein RAD23-1                                       |
| Zm.3014.1.S1_at     | 2.372 | AY107854.1  | hypothetical protein LOC100279768                                |
| Zm.17709.1.S1_at    | 2.371 | CK369588    | ---                                                              |
| Zm.9351.2.S1_at     | 2.364 | CF626430    | transport protein particle component,<br>Bet3 containing protein |
| Zm.1681.1.A1_at     | 2.362 | CA403368    | ---                                                              |
| Zm.12227.1.S1_at    | 2.36  | AY104350.1  | heat shock cognate 70 kDa protein 2                              |
| Zm.14502.2.A1_at    | 2.359 | BM337686    | hypothetical protein LOC100279657                                |
| Zm.18208.1.A1_at    | 2.352 | BM338077    | ---                                                              |
| Zm.2978.1.S1_at     | 2.352 | CD981283    | peptidyl-tRNA hydrolase                                          |
| ZmAffx.1466.1.S1_at | 2.352 | 11990232-33 | ---                                                              |
| Zm.5083.2.A1_a_at   | 2.344 | AY109962.1  | dnaJ protein                                                     |
| Zm.13630.1.S1_at    | 2.337 | AY107387.1  | hypothetical protein LOC100274007                                |
| Zm.2233.1.A1_at     | 2.336 | CO527146    | ---                                                              |
| Zm.3551.1.S1_at     | 2.334 | AY105376.1  | ---                                                              |
| Zm.10358.1.A1_at    | 2.331 | CF635753    | exonuclease                                                      |
| Zm.12423.1.S1_at    | 2.325 | AY105422.1  | reticuline oxidase                                               |
| Zm.2157.6.S1_x_at   | 2.325 | CD439607    | glycine-rich RNA-binding protein 2                               |
| Zm.5283.1.A1_at     | 2.325 | AI619100    | ---                                                              |
| Zm.16959.2.A1_at    | 2.318 | CK347555    | hypothetical protein LOC100274593                                |
| Zm.17605.1.S1_at    | 2.313 | CK368440    | ---                                                              |
| Zm.5792.3.S1_a_at   | 2.309 | BM499429    | ---                                                              |
| Zm.4825.1.A1_at     | 2.306 | AI978181    | hypothetical protein LOC100272679                                |
| Zm.6549.1.A1_at     | 2.305 | BM075679    | ---                                                              |
| Zm.11595.1.A1_at    | 2.299 | BM379199    | hypothetical protein LOC100194210                                |
| ZmAffx.26.1.S1_at   | 2.297 | AI621976    | 30S ribosomal protein S7                                         |

|                     |       |             |                                                   |
|---------------------|-------|-------------|---------------------------------------------------|
| Zm.7028.1.S1_at     | 2.294 | CF016721    | hypothetical protein LOC100278953                 |
| Zm.16324.1.A1_at    | 2.286 | CF032268    | hypothetical protein LOC100194392                 |
| Zm.16504.2.A1_at    | 2.285 | CD438012    | heat shock protein18c                             |
| Zm.6069.2.S1_at     | 2.282 | CO530423    | ---                                               |
| ZmAffx.1489.1.S1_at | 2.282 | 11990232-46 | ---                                               |
| Zm.6364.1.S1_at     | 2.281 | T20372      | ---                                               |
| Zm.3498.1.A1_a_at   | 2.277 | CK367906    | metallothionein1                                  |
| Zm.12426.1.S1_at    | 2.276 | AY111182.1  | ---                                               |
| Zm.782.1.A1_at      | 2.267 | CA404412    | hypothetical protein LOC100273031                 |
| ZmAffx.1513.1.S1_at | 2.266 | 11990232-53 | ---                                               |
| Zm.5785.4.A1_at     | 2.256 | CA403256    | hypothetical protein LOC100279822                 |
| Zm.4679.1.S1_at     | 2.251 | AI737934    | pre-rRNA-processing protein TSR2                  |
| ZmAffx.1143.1.A1_at | 2.249 | AW399931    | ---                                               |
| Zm.9549.2.A1_a_at   | 2.246 | BM332597    | hypothetical protein LOC100191610                 |
| Zm.611.1.A1_at      | 2.242 | AF326499.1  | small basic membrane<br>intrinsic protein2a       |
| Zm.16498.3.A1_x_at  | 2.24  | CK368372    | hypothetical protein LOC100193260                 |
| Zm.17806.1.A1_at    | 2.239 | CF634845    | ---                                               |
| Zm.12760.1.A1_at    | 2.237 | CF637010    | catalytic/ hydrolase                              |
| Zm.10337.1.S1_at    | 2.236 | CO522438    | L-lactate dehydrogenase A                         |
| Zm.2176.1.S1_at     | 2.236 | AY111425.1  | ---                                               |
| Zm.17669.1.S1_at    | 2.231 | CF636811    | ---                                               |
| Zm.7750.2.S1_at     | 2.23  | AY103542.1  | Beta-6 tubulin                                    |
| Zm.17778.1.S1_at    | 2.229 | CK370487    | ---                                               |
| Zm.6666.2.S1_at     | 2.227 | BI478864    | 26S proteasome non-ATPase<br>regulatory subunit 8 |
| Zm.5124.1.S1_at     | 2.222 | CA405206    | ubiquitin-protein ligase                          |
| ZmAffx.581.1.A1_at  | 2.218 | AI714922    | ---                                               |
| Zm.13816.1.A1_at    | 2.216 | AY104641.1  | hypothetical protein LOC100276882                 |
| Zm.17712.1.S1_at    | 2.215 | CK370052    | hypothetical protein LOC100275406                 |
| Zm.3998.1.S1_at     | 2.208 | AY108495.1  | hypothetical protein LOC100278863                 |

|                    |       |            |                                                       |
|--------------------|-------|------------|-------------------------------------------------------|
| Zm.19106.1.A1_at   | 2.203 | CO049276   | ---                                                   |
| Zm.15576.1.A1_x_at | 2.197 | CK827910   | ---                                                   |
| Zm.3791.1.A1_at    | 2.197 | AW224984   | ---                                                   |
| Zm.13241.1.S1_at   | 2.196 | AY059647.1 | alternative oxidase AOX2 precursor                    |
| Zm.7540.1.S1_at    | 2.186 | CF055286   | hypothetical protein LOC100192075                     |
| Zm.537.1.A1_a_at   | 2.185 | AI065500   | hypothetical protein<br>LOC100194026/LOC100273405     |
| Zm.12549.1.A1_at   | 2.182 | AI649492   | mitochondrial aspartate-glutamate<br>transporter AGC1 |
| Zm.15874.1.A1_at   | 2.172 | BM340119   | ---                                                   |
| Zm.18594.1.A1_at   | 2.17  | CO519739   | prMC3                                                 |
| Zm.13766.1.S1_at   | 2.167 | CF630318   | annexin A4                                            |
| Zm.17339.2.A1_a_at | 2.16  | CF633149   | ---                                                   |
| Zm.14932.1.A1_at   | 2.154 | BI993187   | ---                                                   |
| Zm.6404.1.A1_at    | 2.154 | AY110082.1 | ---                                                   |
| Zm.15514.1.A1_at   | 2.152 | CD437159   | hypothetical protein LOC100216604                     |
| Zm.995.1.A1_at     | 2.147 | CF040767   | ---                                                   |
| Zm.14302.2.A1_a_at | 2.144 | AY109645.1 | proteasome subunit alpha type 3                       |
| Zm.12387.1.S1_at   | 2.143 | AW000286   | ---                                                   |
| Zm.1691.2.S1_a_at  | 2.143 | AW681248   | hypothetical protein LOC100191436                     |
| Zm.7750.2.S1_x_at  | 2.14  | AY103542.1 | Beta-6 tubulin                                        |
| Zm.13332.1.S1_at   | 2.139 | AY105769.1 | ribosomal protein L32 containing protein              |
| Zm.5391.2.A1_a_at  | 2.139 | BM336235   | 2-cys peroxiredoxin BAS1                              |
| Zm.5833.1.A1_at    | 2.135 | CA398697   | adenylate kinase                                      |
| Zm.9169.2.S1_at    | 2.133 | CO521754   | hypothetical protein LOC100194136                     |
| Zm.12547.1.A1_at   | 2.132 | AI622168   | RNA binding protein                                   |
| Zm.19137.1.A1_at   | 2.126 | CO523276   | ---                                                   |
| Zm.3851.1.A1_at    | 2.122 | CK394813   | ---                                                   |
| Zm.14513.1.A1_at   | 2.116 | CA828306   | Histone H3.2                                          |
| Zm.13217.1.A1_at   | 2.114 | AI065901   | hypothetical protein LOC100273064                     |



|                           |       |                  |                                                   |
|---------------------------|-------|------------------|---------------------------------------------------|
| Zm.12420.1.S1_at          | 2.113 | BF728806         | ---                                               |
| Zm.1934.1.S1_at           | 2.112 | AW519956         | glycerophosphodiester<br>phosphodiesterase        |
| Zm.14316.1.S1_at          | 2.108 | AY104671.1       | hypothetical protein<br>LOC100274358/LOC100277073 |
| Zm.2447.1.A1_at           | 2.108 | BM079996         | ---                                               |
| ZmAffx.963.1.A1_at        | 2.107 | AI833792         | ---                                               |
| Zm.6532.1.A1_at           | 2.104 | U09276.1         | abscisic stress protein homolog                   |
| ZmAffx.675.1.A1_at        | 2.097 | AI734494         | ---                                               |
| Zm.4225.1.S1_at           | 2.087 | AW225317         | hypothetical protein LOC100192639                 |
| Zm.13809.1.A1_at          | 2.08  | AY104739.1       | hypothetical protein LOC100275407                 |
| Zm.4431.1.S1_at           | 2.076 | AI714808         | protein phosphatase methylesterase 1              |
| Zm.16498.3.A1_at          | 2.074 | CK368372         | Hypothetical protein LOC100193260                 |
| Zm.3855.1.S1_at           | 2.074 | AA979788         | ---                                               |
| Zm.9595.1.A1_at           | 2.073 | BM333398         | seven transmembrane domain protein                |
| Zm.12376.1.S1_at          | 2.065 | BQ577893         | ---                                               |
| Zm.5141.2.A1_a_at         | 2.063 | AI691820         | hypothetical protein<br>LOC100191902/LOC100273101 |
| ZmAffx.1224.1.S1_at       | 2.063 | 11990232-11<br>5 | ---                                               |
| Zm.5486.1.A1_at           | 2.062 | AI629867         | ---                                               |
| Zm.13988.1.S1_at          | 2.061 | AY103582.1       | hypothetical protein LOC100279316                 |
| Zm.12216.1.S1_at          | 2.053 | CF050683         | ---                                               |
| ZmAffx.1498.1.S1_s<br>_at | 2.052 | 40794996-11<br>5 | ---                                               |
| Zm.3838.1.A1_at           | 2.05  | CF063291         | ---                                               |
| Zm.6748.1.A1_x_at         | 2.05  | BM351187         | Ribosomal protein L26                             |
| Zm.8247.1.A1_at           | 2.049 | BM073399         | ---                                               |
| ZmAffx.1453.1.S1_at       | 2.049 | 11990232-20      | ---                                               |
| Zm.19099.1.S1_at          | 2.047 | CO530975         | ---                                               |
| Zm.2323.1.A1_at           | 2.044 | CO526297         | hypothetical protein LOC100273265                 |

|                    |       |            |                                                   |
|--------------------|-------|------------|---------------------------------------------------|
| Zm.6397.1.A1_at    | 2.043 | AI691676   | ---                                               |
| Zm.505.2.S1_a_at   | 2.04  | AI665681   | glucose translocator1                             |
| Zm.3098.1.A1_at    | 2.039 | BM379893   | caffeoyl-CoA O-methyltransferase 1                |
| Zm.3719.1.A1_at    | 2.039 | CK370903   | ---                                               |
| Zm.12534.1.A1_at   | 2.038 | CF628471   | hypothetical protein LOC100192944                 |
| Zm.5181.1.A1_at    | 2.033 | CF030446   | CK2 protein kinase alpha 2                        |
| Zm.3476.1.A1_at    | 2.032 | BQ538179   | ---                                               |
| Zm.2000.1.A1_at    | 2.031 | AY110879.1 | ---                                               |
| Zm.6155.1.A1_a_at  | 2.029 | T20358     | hypothetical protein LOC100273594                 |
| Zm.14302.2.A1_x_at | 2.02  | AY109645.1 | proteasome subunit alpha type 3                   |
| Zm.6130.1.S1_at    | 2.02  | CF056233   | Hypothetical protein LOC100216775                 |
| Zm.5496.1.S1_at    | 2.016 | AY105645.1 | hypothetical protein LOC100275844                 |
| Zm.18525.1.A1_at   | 2.015 | CO530497   | ---                                               |
| Zm.4517.1.A1_at    | 2.015 | AY105906.1 | hypothetical protein LOC100191201                 |
| Zm.8107.1.A1_at    | 2.013 | CK827080   | ---                                               |
| Zm.9952.1.A1_at    | 2.004 | BM349898   | ---                                               |
| Zm.3219.3.S1_at    | 2.003 | CF056029   | thiamine biosynthesis protein thiC                |
| Zm.14532.1.A1_a_at | 2.001 | AY172634.2 | isoamylase-type starch debranching<br>enzyme ISO3 |
| Zm.6207.6.S1_at    | 2.001 | BM895377   | 60S ribosomal protein L15                         |
| Zm.8581.1.A1_at    | 0.5   | BM267381   | hypothetical protein LOC100216584                 |
| Zm.9696.1.S1_at    | 0.5   | BM337562   | ---                                               |
| Zm.5853.1.A1_at    | 0.499 | AI649903   | hypothetical protein LOC100193409                 |
| Zm.16259.1.A1_x_at | 0.498 | BQ539455   | hypothetical protein LOC100273269                 |
| Zm.7012.8.A1_x_at  | 0.498 | BU092758   | ribosomal protein S8                              |
| Zm.16232.1.A1_a_at | 0.497 | BG842260   | hypothetical protein LOC100278121                 |
| Zm.18066.1.A1_s_at | 0.496 | AI738164   | hypothetical protein LOC100272811                 |
| Zm.1322.1.A1_at    | 0.495 | AI737263   | hypothetical protein LOC100279212                 |
| Zm.15480.1.S1_at   | 0.495 | BM349789   | ---                                               |

|                           |       |                  |                                   |
|---------------------------|-------|------------------|-----------------------------------|
| Zm.16142.1.S1_at          | 0.495 | CF243882         | hypothetical protein LOC100194402 |
| Zm.2483.1.A1_at           | 0.492 | BG841687         | hypothetical protein LOC100275206 |
| Zm.6569.2.S1_a_at         | 0.491 | AY107413.1       | hypothetical protein LOC100276303 |
| Zm.7025.1.A1_at           | 0.488 | CF047868         | hypothetical protein LOC100274924 |
| Zm.858.1.A1_at            | 0.488 | BM073310         | hypothetical protein LOC100216691 |
| Zm.16508.3.A1_x_at        | 0.487 | AI739900         | ribosomal protein L39             |
| Zm.14398.2.A1_a_at        | 0.486 | CK985944         | protein OS-9/protein OS-9         |
| Zm.16228.1.S1_a_at        | 0.486 | BU197473         | hypothetical protein LOC100275186 |
| Zm.14833.1.A1_at          | 0.485 | CF629020         | ---                               |
| ZmAffx.1217.1.S1_s<br>_at | 0.484 | 40794996-16<br>4 | ---                               |
| Zm.466.1.S1_at            | 0.483 | AI622469         | Acidic ribosomal protein P2a-4    |
| Zm.10850.1.S1_at          | 0.482 | AY106263.1       | ZIM motif family protein          |
| Zm.16936.1.A1_at          | 0.482 | AY108717.1       | ---                               |
| Zm.14531.1.S1_at          | 0.481 | AY111968.1       | invertase cell wall3              |
| Zm.2412.1.S1_at           | 0.481 | BM349568         | hypothetical protein LOC100192774 |
| Zm.3475.1.S1_at           | 0.481 | CF002596         | ribosomal protein S27             |
| Zm.4553.2.S1_a_at         | 0.481 | AI734766         | ---                               |
| Zm.5661.1.A1_at           | 0.481 | AY107527.1       | ---                               |
| Zm.14934.1.A1_at          | 0.479 | CK986163         | CHCH domain containing protein    |
| Zm.4212.2.S1_a_at         | 0.478 | BI543125         | 60S ribosomal protein L22-2       |
| Zm.4949.1.A1_at           | 0.478 | BM379432         | ---                               |
| Zm.733.1.S1_at            | 0.478 | AY108731.1       | SINA2                             |
| Zm.312.1.A1_at            | 0.477 | S72425.1         | ADP-glucose pyrophosphorylase     |
| Zm.13787.1.S1_at          | 0.476 | AY105138.1       | ---                               |
| ZmAffx.1298.1.S1_at       | 0.476 | 40794996-13<br>9 | ---                               |
| ZmAffx.1535.1.S1_at       | 0.476 | 40794996-15      | ---                               |
| Zm.10097.1.A1_at          | 0.472 | BQ538355         | cupin, RmlC-type                  |

|                     |       |                  |                                                   |
|---------------------|-------|------------------|---------------------------------------------------|
| Zm.9791.1.S1_at     | 0.471 | AY110405.1       | hypothetical protein LOC100216896                 |
| ZmAffx.1405.1.S1_at | 0.471 | 40794996-80      | ---                                               |
| Zm.3743.2.A1_a_at   | 0.47  | CF624095         | hypothetical protein LOC100274177                 |
| Zm.4784.1.A1_at     | 0.468 | BM338307         | hypothetical protein LOC100277212                 |
| Zm.12022.1.A1_at    | 0.467 | BM382727         | ---                                               |
| Zm.19125.1.S1_at    | 0.466 | CF631194         | hypothetical protein LOC100278829                 |
| ZmAffx.1358.1.S1_at | 0.466 | 40794996-15<br>9 | ---                                               |
| Zm.13307.1.S1_at    | 0.465 | CA827415         | ---                                               |
| Zm.2208.1.S1_at     | 0.465 | CO527853         | malonyl CoA-acyl carrier protein<br>transacylase  |
| Zm.3183.1.A1_at     | 0.464 | CF634309         | hypothetical protein LOC100274988                 |
| Zm.11428.1.A1_at    | 0.463 | CF244302         | hypothetical protein LOC100274452                 |
| Zm.6650.1.A1_at     | 0.463 | BM336595         | fiber protein Fb2                                 |
| Zm.1250.2.S1_at     | 0.462 | AY104390.1       | Hypothetical protein LOC100191515                 |
| ZmAffx.1416.1.S1_at | 0.462 | 40794996-91      | ---                                               |
| Zm.10324.1.A1_at    | 0.461 | BQ048175         | ---                                               |
| Zm.15432.1.S1_at    | 0.459 | CA401222         | ---                                               |
| Zm.17260.1.A1_at    | 0.459 | CK145375         | hypothetical protein LOC100277879                 |
| Zm.13578.1.A1_at    | 0.458 | AY107890.1       | ---                                               |
| Zm.1554.1.S1_a_at   | 0.458 | AW287806         | hypothetical protein<br>LOC100275340/LOC100276203 |
| Zm.8540.1.A1_at     | 0.458 | BM079841         | hypothetical protein LOC100193457                 |
| Zm.5417.1.A1_at     | 0.455 | CA403570         | hypothetical protein LOC100193358                 |
| Zm.15811.1.S1_at    | 0.454 | CF633035         | RNA binding protein                               |
| Zm.9980.1.A1_at     | 0.452 | BM331957         | ---                                               |
| Zm.17253.1.S1_at    | 0.451 | CA398537         | ---                                               |
| Zm.4543.1.S1_at     | 0.451 | CF628165         | hypothetical protein LOC100192734                 |
| Zm.13304.1.S1_at    | 0.45  | CA827334         | ---                                               |
| Zm.1807.1.A1_at     | 0.448 | AW453229         | hypothetical protein LOC100279285                 |

|                     |       |                  |                                                          |
|---------------------|-------|------------------|----------------------------------------------------------|
| Zm.280.1.A1_at      | 0.446 | U58208.1         | Binding protein homolog1                                 |
| Zm.15288.1.A1_at    | 0.445 | CK369497         | hypothetical protein LOC100276056                        |
| Zm.650.1.S1_at      | 0.445 | AY029556.1       | methyl-binding domain protein MBD101                     |
| Zm.2812.1.S1_at     | 0.444 | AW067476         | ---                                                      |
| ZmAffx.1479.1.S1_at | 0.443 | 40794996-10<br>6 | ---                                                      |
| Zm.10091.1.A1_at    | 0.442 | BM382104         | hypothetical protein LOC100277849                        |
| Zm.15320.2.S1_x_at  | 0.439 | CF633376         | ---                                                      |
| Zm.4836.1.A1_at     | 0.437 | BM078446         | fb14                                                     |
| Zm.3900.1.S1_at     | 0.435 | BM073698         | ---                                                      |
| Zm.4361.1.A1_at     | 0.434 | CD436511         | hypothetical protein LOC100192530                        |
| Zm.16259.3.A1_x_at  | 0.433 | AI395995         | hypothetical protein LOC100273269                        |
| Zm.17594.1.S1_at    | 0.433 | CA402152         | hypothetical protein LOC100276455                        |
| ZmAffx.790.1.A1_at  | 0.433 | AI759115         | ---                                                      |
| Zm.7976.1.S1_at     | 0.432 | BM080696         | hypothetical protein LOC100217261                        |
| ZmAffx.1326.1.S1_at | 0.432 | 40794996-14<br>8 | ---                                                      |
| Zm.16524.1.S1_at    | 0.431 | AW054294         | hypothetical protein LOC100193178                        |
| Zm.3412.1.S1_at     | 0.431 | CA405066         | ---                                                      |
| Zm.13715.1.A1_at    | 0.429 | AY106496.1       | hypothetical protein LOC100276156                        |
| Zm.2441.1.S1_s_at   | 0.428 | BE510252         | CFM6                                                     |
| Zm.7095.1.A1_a_at   | 0.428 | CK371352         | hypothetical protein LOC100194044                        |
| Zm.2997.1.S1_at     | 0.426 | CD983066         | REX1 DNA Repair family protein                           |
| Zm.19203.1.S1_at    | 0.425 | CO520849         | hypothetical protein LOC100193957                        |
| Zm.5549.1.A1_at     | 0.423 | CK144503         | hypothetical protein LOC100273359                        |
| ZmAffx.831.1.S1_at  | 0.423 | AI770541         | hypothetical protein LOC100191667                        |
| ZmAffx.548.1.A1_at  | 0.421 | AI712133         | 2-C-methyl-D-erythritol<br>2,4-cyclodiphosphate synthase |
| Zm.4615.2.A1_at     | 0.418 | AI714747         | ---                                                      |
| Zm.14154.1.A1_s_at  | 0.411 | BM073783         | gibberellin-regulated protein 2                          |

|                     |       |             |                                                                                  |
|---------------------|-------|-------------|----------------------------------------------------------------------------------|
| Zm.206.4.A1_s_at    | 0.408 | CF048188    | ribosomal protein S21/<br>40S ribosomal subunit protein S21                      |
| Zm.7012.7.A1_a_at   | 0.408 | AI881466    | ribosomal protein S8                                                             |
| Zm.8492.1.A1_at     | 0.408 | CO518733    | cyclin-dependent kinases<br>regulatory subunit                                   |
| Zm.9905.1.A1_at     | 0.403 | AY107944.1  | IDP680 protein/<br>RAB5-interacting protein                                      |
| Zm.1701.1.S1_at     | 0.401 | AW399969    | hypothetical protein LOC100280325                                                |
| Zm.1784.1.S1_at     | 0.397 | BF728627    | hypothetical protein LOC100277524                                                |
| Zm.14013.1.A1_a_at  | 0.392 | BM075523    | hypothetical protein<br>LOC100193147/LOC100275870/<br>LOC100276632/ LOC100278726 |
| Zm.15004.1.S1_at    | 0.392 | BG840536    | caltractin                                                                       |
| Zm.2165.1.A1_at     | 0.392 | BM072875    | hypothetical protein LOC100278701                                                |
| ZmAffx.1355.1.S1_at | 0.39  | 40794996-45 | ---                                                                              |
| Zm.10500.1.S1_at    | 0.388 | CA827201    | ---                                                                              |
| Zm.18336.1.A1_at    | 0.388 | CO520030    | ---                                                                              |
| Zm.678.1.S1_at      | 0.387 | AF302187.1  | sucrose export defective1                                                        |
| Zm.6662.1.A1_a_at   | 0.386 | AY108391.1  | 50S ribosomal protein L20                                                        |
| Zm.13941.1.S1_at    | 0.385 | CB380998    | hypothetical protein LOC100277314                                                |
| Zm.18141.1.S1_at    | 0.381 | CF024422    | ---                                                                              |
| Zm.6298.1.A1_at     | 0.375 | CD444675    | hypothetical protein LOC100278812                                                |
| Zm.18062.1.A1_at    | 0.371 | CO526041    | hypothetical protein LOC100192968                                                |
| Zm.10299.1.S1_at    | 0.369 | AW172106    | ---                                                                              |
| Zm.3284.1.A1_at     | 0.369 | BM952816    | ---                                                                              |
| Zm.16475.2.S1_at    | 0.367 | CK371021    | ---                                                                              |
| Zm.17336.1.A1_at    | 0.366 | CF632816    | ---                                                                              |
| Zm.19304.1.A1_at    | 0.366 | CO525321    | hypothetical protein LOC100192965                                                |
| Zm.4326.1.A1_at     | 0.366 | AI711615    | hypothetical protein AY106635                                                    |
| Zm.8142.1.A1_at     | 0.366 | BM080424    | hypothetical protein LOC100275043                                                |
| ZmAffx.1294.1.S1_at | 0.365 | 40794996-13 | ---                                                                              |

|                           |       |                  |                                                      |
|---------------------------|-------|------------------|------------------------------------------------------|
| Zm.7569.1.A1_at           | 0.362 | BM347275         | ---                                                  |
| Zm.10294.1.S1_at          | 0.361 | CD944058         | ---                                                  |
| Zm.9710.1.S1_at           | 0.361 | CF624968         | hypothetical protein LOC100276125                    |
| Zm.8233.3.S1_a_at         | 0.359 | BQ294345         | splicing factor, arginine/serine-rich 7              |
| Zm.8925.1.A1_at           | 0.359 | BM381305         | ---                                                  |
| Zm.13825.1.S1_at          | 0.353 | AY104501.1       | ---                                                  |
| Zm.3781.1.S1_at           | 0.348 | CD447284         | syntaxin 132                                         |
| Zm.12654.1.S1_at          | 0.347 | BU098714         | ---                                                  |
| Zm.13600.1.A1_at          | 0.346 | CD440740         | surfeit locus protein 5                              |
| Zm.4312.2.S1_at           | 0.344 | AY107006.1       | ---                                                  |
| Zm.12030.1.A1_at          | 0.343 | CF623978         | ---                                                  |
| Zm.16501.1.S1_at          | 0.335 | AY108566.1       | ---                                                  |
| Zm.14412.1.S1_a_at        | 0.331 | BM337383         | hypothetical protein LOC100194289                    |
| Zm.9733.2.A1_a_at         | 0.331 | BM337265         | nuclear transcription factor Y subunit<br>A-1        |
| Zm.3248.1.A1_at           | 0.33  | BG842948         | hypothetical protein LOC100278584                    |
| Zm.14376.1.S1_at          | 0.326 | BG836683         | diphosphomevalonate decarboxylase                    |
| Zm.1291.1.S1_at           | 0.325 | CO533162         | hypothetical protein LOC100194121                    |
| ZmAffx.49.1.A1_at         | 0.325 | AI664982         | ---                                                  |
| Zm.2514.1.A1_at           | 0.324 | CO524312         | hypothetical protein LOC100273294                    |
| ZmAffx.1219.1.S1_s<br>_at | 0.323 | 40794996-16<br>6 | ---                                                  |
| Zm.18685.1.A1_at          | 0.318 | CO532513         | hypothetical protein LOC100194065                    |
| Zm.4553.1.S1_at           | 0.318 | BE238641         | ---                                                  |
| Zm.6023.1.S1_at           | 0.313 | AY059648.1       | alternative oxidase AOX3 precursor                   |
| Zm.585.1.S1_at            | 0.31  | AF180131.1       | female gametophyte-specific protein<br>ES1 precursor |
| Zm.6838.1.A1_at           | 0.31  | CF035294         | ---                                                  |
| Zm.5766.1.S1_x_at         | 0.305 | BG840404         | ---                                                  |
| Zm.2884.1.S1_at           | 0.303 | AW090890         | hypothetical protein LOC100192085                    |

|                           |       |                  |                                                                     |
|---------------------------|-------|------------------|---------------------------------------------------------------------|
| Zm.6208.1.A1_at           | 0.303 | CO527309         | hypothetical protein LOC100273615                                   |
| Zm.1451.2.S1_x_at         | 0.302 | CF021148         | calmodulin                                                          |
| Zm.8921.1.A1_at           | 0.3   | BM075327         | hypothetical protein LOC100217070                                   |
| Zm.4312.2.S1_at           | 0.3   | AY107006.1       | ---                                                                 |
| Zm.13601.1.S1_at          | 0.297 | AY107674.1       | ---                                                                 |
| Zm.17267.1.S1_at          | 0.297 | CK368940         | hypothetical protein LOC100275082                                   |
| Zm.3135.1.S1_at           | 0.297 | CD981826         | catalytic/ protein phosphatase type 2C                              |
| Zm.1747.1.A1_at           | 0.295 | CF633743         | ---                                                                 |
| Zm.889.2.S1_at            | 0.294 | CD439290         | ---                                                                 |
| Zm.14441.1.A1_at          | 0.291 | CO531121         | HAD-superfamily hydrolase,<br>subfamily IIA                         |
| Zm.16590.3.A1_at          | 0.289 | AY104237.1       | DNA-directed RNA polymerases I, II,<br>and III 14.4 kDa polypeptide |
| ZmAffx.1376.1.S1_s<br>_at | 0.284 | 40794996-51      | ---                                                                 |
| Zm.6605.1.A1_at           | 0.283 | AI444684         | hypothetical protein LOC100191572                                   |
| ZmAffx.1352.1.S1_at       | 0.279 | 40794996-15<br>6 | ---                                                                 |
| Zm.17931.1.A1_at          | 0.271 | CK827676         | hydrogen-transporting ATP<br>synthase, rotational mechanism         |
| Zm.11918.1.A1_at          | 0.27  | BM381808         | hypothetical protein LOC100274802                                   |
| Zm.11646.1.A1_at          | 0.269 | CO523950         | hypothetical protein LOC100273629                                   |
| Zm.16904.2.A1_a_at        | 0.269 | BM381185         | ---                                                                 |
| Zm.10452.1.A1_at          | 0.268 | CK826753         | hypothetical protein LOC100275165                                   |
| Zm.11748.1.A1_at          | 0.266 | BM380426         | hypothetical protein LOC100276902                                   |
| Zm.17274.1.A1_at          | 0.263 | CK371488         | ---                                                                 |
| Zm.18350.1.A1_at          | 0.255 | CO524599         | ---                                                                 |
| ZmAffx.1474.1.S1_s<br>_at | 0.252 | 40794996-10<br>1 | ---                                                                 |
| Zm.12528.1.A1_at          | 0.251 | AI734581         | hypothetical protein LOC100274560                                   |



|                    |       |            |                                   |
|--------------------|-------|------------|-----------------------------------|
| Zm.955.1.A1_at     | 0.25  | BM339428   | e2 protein                        |
| Zm.12980.1.A1_at   | 0.241 | CA402690   | ---                               |
| Zm.4069.1.A1_at    | 0.239 | CO532116   | hypothetical protein LOC100274464 |
| Zm.17145.1.S1_at   | 0.235 | AY211982.1 | transparent leaf area peptide     |
| Zm.5823.1.A1_at    | 0.228 | CO520297   | hypothetical protein LOC100194104 |
| Zm.17821.1.S1_at   | 0.218 | CD961542   | myo-inositol kinase               |
| Zm.3668.1.A1_at    | 0.218 | AI649862   | ---                               |
| Zm.4611.1.A1_at    | 0.218 | BG842817   | IDP139 protein                    |
| Zm.11638.1.S1_at   | 0.211 | BM379507   | ---                               |
| Zm.13299.1.S1_at   | 0.211 | BQ486451   | ---                               |
| Zm.1451.2.S1_at    | 0.209 | CF021148   | calmodulin                        |
| Zm.6598.1.A1_at    | 0.206 | AI737222   | gibberellin-regulated protein 2   |
| Zm.4118.1.A1_at    | 0.204 | AY105314.1 | IDP1681 protein                   |
| Zm.2040.1.S1_at    | 0.189 | BM338990   | hypothetical protein LOC100194284 |
| Zm.4083.1.A1_at    | 0.188 | CA403575   | hypothetical protein LOC100191657 |
| Zm.12422.1.S1_at   | 0.181 | AW400260   | ---                               |
| Zm.10247.1.S1_at   | 0.178 | BU049731   | ---                               |
| Zm.18590.1.A1_at   | 0.176 | AW562614   | exostosin-like                    |
| Zm.3174.1.A1_at    | 0.176 | BM072921   | AP-2 complex subunit sigma-1      |
| ZmAffx.466.1.S1_at | 0.175 | AI677405   | ---                               |
| Zm.12622.1.A1_at   | 0.171 | BU051177   | hypothetical protein LOC100278739 |
| Zm.2695.1.S1_at    | 0.164 | CN844861   | hypothetical protein LOC100279628 |
| Zm.2397.1.A1_at    | 0.16  | AY104240.1 | nucleolin                         |
| Zm.9832.1.A1_at    | 0.12  | BM340381   | hypothetical protein LOC100279963 |
| Zm.2345.1.S1_at    | 0.117 | BF727904   | ---                               |
| Zm.4056.1.A1_at    | 0.104 | CA403994   | hypothetical protein LOC100192464 |
| Zm.15759.1.A1_at   | 0.097 | AW129802   | hypothetical protein LOC100277415 |
| Zm.14265.1.A1_at   | 0.081 | AY105423.1 | hypothetical protein LOC100272919 |
| Zm.7750.4.S1_at    | 0.076 | AW499152   | ---                               |

|                    |       |          |                                   |
|--------------------|-------|----------|-----------------------------------|
| Zm.15602.1.S1_at   | 0.06  | CA399213 | ---                               |
| Zm.16232.1.A1_x_at | 0.059 | BG842260 | hypothetical protein LOC100278121 |
| ZmAffx.92.1.A1_at  | 0.043 | AI665387 | ---                               |
| Zm.16259.3.A1_a_at | 0.027 | AI395995 | hypothetical protein LOC100273269 |
| Zm.10455.1.S1_at   | 0.023 | BQ577982 | ---                               |
| Zm.11825.1.S1_at   | 0.018 | BM381071 | hypothetical protein LOC100276984 |
| ZmAffx.466.1.A1_at | 0.018 | AI677405 | ---                               |
| Zm.17801.1.S1_at   | 0.015 | CK371451 | ---                               |

---

“---” represents the genes have no annotations.

**Supplemental Table S3:** List of primers used for Microarray analysis

| Primer name | Primer sequence               |
|-------------|-------------------------------|
| AI714808f   | 5' - ATGACGAGCTGATCCTGCTT-3'  |
| AI714808r   | 5' - ATGTCGCATGAGTTGCTTTG-3'  |
| CD438012f   | 5' -AGGGAGCAAGCAGTAGCTGT-3'   |
| CD438012r   | 5' -TGGCGACACGATCTTCACTA-3'   |
| AY172634    | 5' -GCTAATCGTTTTGCGGAGAC-3'   |
| AY172634    | 5' -CCCATTTCCCTTGGTCACACT-3'  |
| AF302187f   | 5' - CTCCTTTACCTCCCCCTCAG-3'  |
| AF302187r   | 5' -GCGTGGGCGATATAACAACACT-3' |
| CF021148f   | 5' -AGTTGCTGAAAATGGCAATG-3'   |
| CF021148r   | 5' -TGTGGGTGGGGTGAAACTA-3'    |
